# Supplementary material for: Injury incidence in elite youth field hockey players at the 2016 European Championships
Source: PLoS One. 2018 Aug 23;13(8):e0201834. doi: 10.1371/journal.pone.0201834 (PMC6107116; doi:10.1371/journal.pone.0201834)
Supplement: S1 File — This sheet was used by the authors and tournament officials for recording details related to injuries acquired by players at the 2016 U18 European Hockey Championships I. (PDF) [file pone.0201834.s001.pdf]

Date: Time:

Time:

Competition: BOYS/GIRLS

Pitch: GARRYDUFF/MARDYKE

Teams:

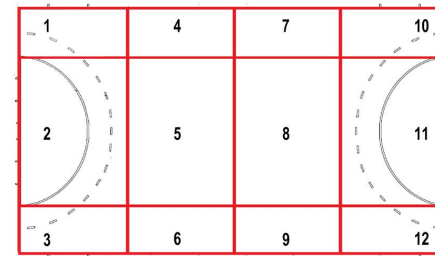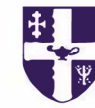

**Loughborough University**

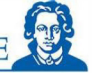

GOETHE  
UNIVERSITÄT  
FRANKFURT AM MAIN

[illegible]
